# Supplementary material for: A New Optimization Approach for Maximizing the Photovoltaic Panel Power Based on Genetic Algorithm and Lagrange Multiplier Algorithm
Source: Hindawi journal article supplement (doi:10.1155/2013/481468), 2013-01-01
Supplement: f1 [file 481468.f1.docx]

- We model a generalized PV module current equation of *Ns* cells and *Np* branches.
- We build an optimization problem to maximize the PV module output power.
- We model an objective function of the module output power subjected to equality and inequality constraints.
- We solve the problem by two techniques Genetic Algorithm and Lagrange multiplier.
- We perform Analysis for complete sunny day and the error between two techniques is acceptable.
